# Supplementary material for: Soil composition and plant genotype determine benzoxazinoid‐mediated plant–soil feedbacks in cereals
Source: PubMed Central journal article supplement — Plant Cell Environ. 2021 Sep 23;44(12):3732–44. doi: 10.1111/pce.14184 (PMC9292949; doi:10.1111/pce.14184), 2021-09-23
Supplement: PCE-44-3732-s001.pdf [file PCE-44-3732-s001.pdf]

# Experiment 2 - Data S2

*Selma Cadot and Valentin Gfeller*

2021-07-01

## Experiment 2 - BX-feedbacks on maize in Q-Matte soil

To further test BX-feedbacks we conducted a second experiment with greenhouse-conditioned batches of 'Q-Matte' soil along with 'Changins' soil as a control (Table S1). The experimental design was fully randomized and full factorial (2 soils \* 2 BX condition; BX+ or BX-) with 15 replicates (total of 60 experimental units; see Data S2). Two litre pots containing the differentially conditioned soils were seeded with B73 maize plants and grown under controlled conditions (day/night: 16 h/8 h; temperature: 26 °C/23 °C; light: 550  $\mu\text{mol m}^{-2}\text{s}^{-1}$ ; humidity: 50%) in a walk-in climate chamber. Plants received 100 ml fertilizer (0.2% [w/v] Plantactive Typ K (Hauert) supplemented with 1 ‰ [w/v] Sequestrene rapid (Maag)) at two, four and six weeks and were watered as needed and weekly randomized. The experiment was stopped at 9 weeks and 3 days of growth, measuring plant height and harvesting maize shoots, which were dried (80 °C for 72 h) and weighed on a microbalance.

Table 1: Number of replicates

|                 | BX+ | BX- |
|-----------------|-----|-----|
| <b>Changins</b> | 15  | 15  |
| <b>Q_Matte</b>  | 15  | 15  |

Feedback experiment with maize (B73) grown on Changins (arable field) and Q-matte (grassland) soil (*soil* variable) conditioned with maize B73 (BX+ soil) and B73(*bx1*) (BX- soil) (*BX\_condition* variable).

## Maize growth (height and shoot dry weight)

Table 2: ANOVA on maize height and shoot dry weight (DW).  
Model : response variable ~ BX condition \* soil

|                          | Sum Sq        | Pr(>F)  | Sum Sq    | Pr(>F)  |
|--------------------------|---------------|---------|-----------|---------|
| <b>1</b>                 | <b>Height</b> |         | <b>DW</b> |         |
| <b>BX_condition</b>      | 0.00758       | 0.0561  | 0.04657   | 0.0937  |
| <b>soil</b>              | 1.10135       | 0       | 5.09876   | 0       |
| <b>BX_condition:soil</b> | 0.01044       | 0.02591 | 0.06744   | 0.04488 |
| <b>Residuals</b>         | 0.10952       | NA      | 0.88038   | NA      |

Table 3: T.test Maize on Changins soil

| Parameter       | mean in BX+ | mean in BX- | p.value  |
|-----------------|-------------|-------------|----------|
| <b>Height</b>   | 76.91       | 80.53       | 0.005925 |
| <b>Shoot DW</b> | 7.186       | 8.062       | 0.0156   |

Table 4: T.test Maize on Q-Matte soil

| Parameter       | mean in BX+ | mean in BX- | p.value |
|-----------------|-------------|-------------|---------|
| <b>Height</b>   | 103.8       | 103         | 0.6455  |
| <b>Shoot DW</b> | 13.78       | 13.63       | 0.8295  |

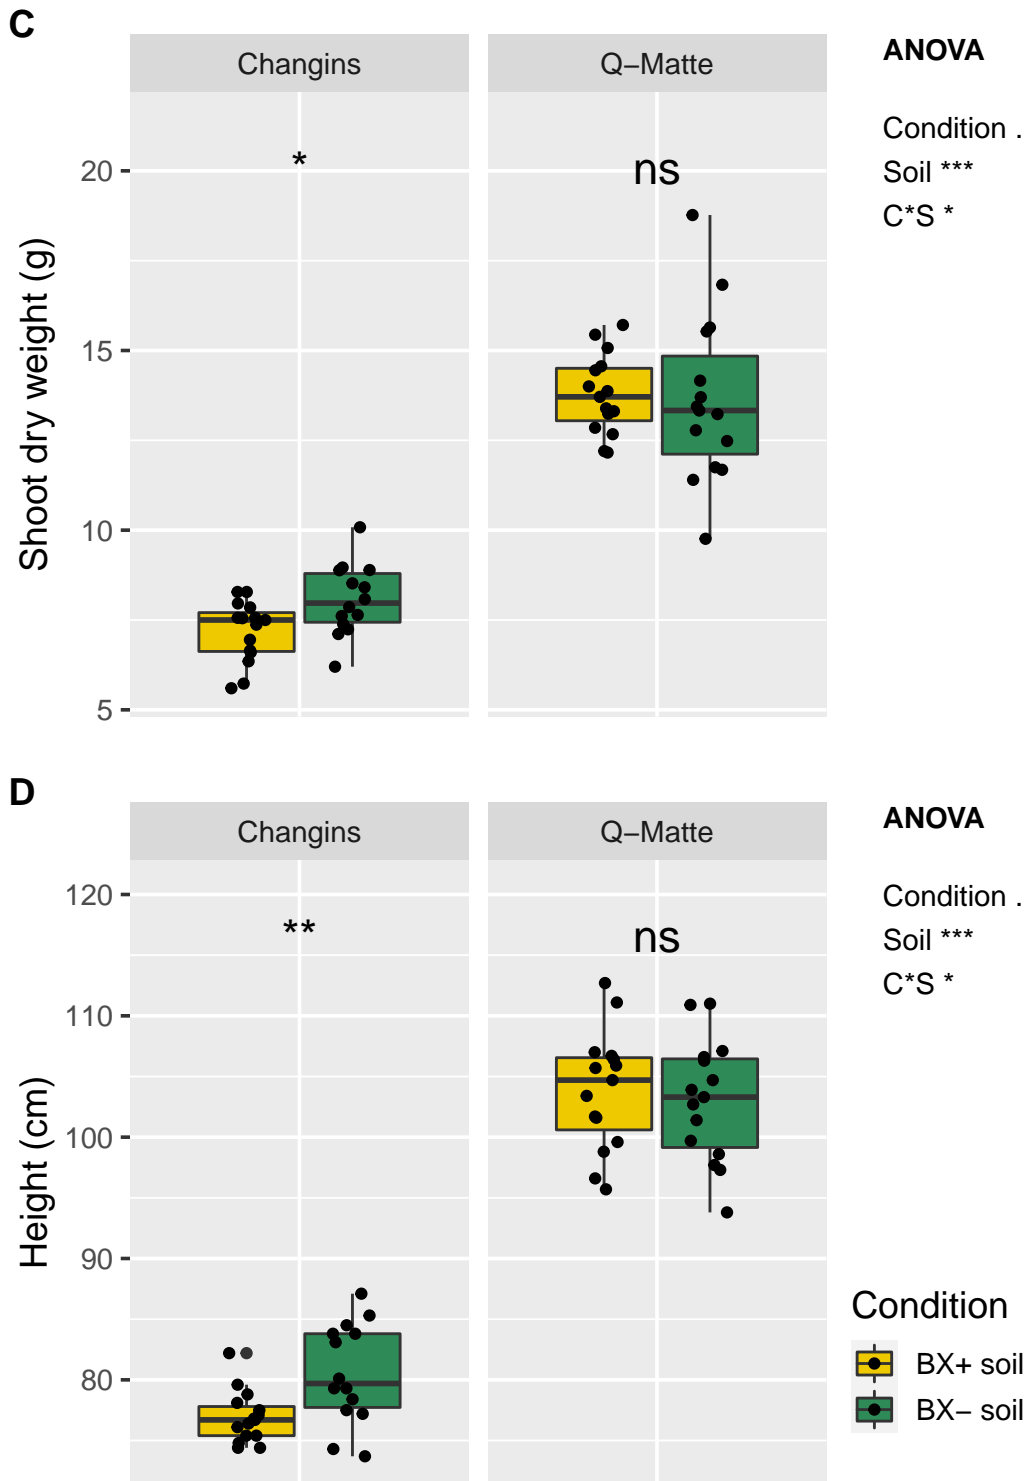

**Figure 1 | BX-feedback on maize growth** Maize plants were grown on ‘BX+’ and ‘BX-’ variants of Changins soil as a control and compared to Reckenholz (A,B, data S1) and in a separate experiment to Q-Matte soil (C,D). Shoot biomass (A, dry weight) and shoot height (B) was recorded after 10 weeks. The Q-matte experiment was harvested after 9 weeks and 3 days measuring shoot biomass (C, dry weight) and shoot height (D). The ANOVA results (model: ~ condition (C) \* soil (S)) are reported next to the Figure and the pair-wise T-test results inside the panels (Significance code:  $P < 0.001$  \*\*\*;  $P < 0.01$  \*,  $P < 0.05$  ; not significant = ‘n.s.’).
