# Supplementary material for: Soil composition and plant genotype determine benzoxazinoid‐mediated plant–soil feedbacks in cereals
Source: PubMed Central journal article supplement — Plant Cell Environ. 2021 Sep 23;44(12):3732–44. doi: 10.1111/pce.14184 (PMC9292949; doi:10.1111/pce.14184), 2021-09-23
Supplement: PCE-44-3732-s003.pdf [file PCE-44-3732-s003.pdf]

# Experiment 4 - Data S5

*Cadot et al.*

2021-07-01

## Experiment 4 – BX-feedback on wheat insect resistance

A fourth experiment, using a fully randomized design for testing the factor conditioning (BX+ or BX-), was set up in a climate chamber to examine insect performance. Experiment 4 was conducted with a greenhouse-conditioned batch of Changins soil (Table S1). The conditioned soils (BX+ and BX- variants) were further sieved to 5 mm, filled in 300 mL pots and sown with four wheat plants. We used again the two wheat cultivars ‘Drifter’ and ‘Fiorina’ resulting in 40 experimental units (2 BX conditions \* 2 cultivars \* 10 replicates; Data S4). Plants were grown with a light period from 8:00 to 22:00 at 22 °C and 18°C at night, with 70% relative humidity. At five weeks, when we terminated the experiment, Drifter was at the vegetative stage while Fiorina started flowering. We approximated the chlorophyll content and used two fully expanded leaves per plant for a caterpillar performance assay.

Table 1: Number of replicates

|                | BX+ | BX- |
|----------------|-----|-----|
| <b>Drifter</b> | 10  | 10  |
| <b>Fiorina</b> | 10  | 9   |

Feedback experiment with wheat (Drifter and Fiorina) (*wheat\_line* variable) grown on Changins soil previously conditioned with maize B73 (BX+ soil) and B73(*bx1*) (BX- soil) (*BX\_condition* variable).

*S. littoralis* growth rate

Table 2: Linear mixed-effect model on Caterpillar growth rate, at 5 weeks. Model = caterpillar growth rate ~ day\_feeding \* BX\_condition \* wheat\_line, random=~1|individual

|                                     | numDF | denDF | F-value | p-value   |
|-------------------------------------|-------|-------|---------|-----------|
| (Intercept)                         | 1     | 55    | 69.2    | 2.646e-11 |
| day_feeding                         | 2     | 55    | 26.72   | 7.79e-09  |
| BX_condition                        | 1     | 31    | 0.8084  | 0.3755    |
| wheat_line                          | 1     | 31    | 0.08093 | 0.7779    |
| day_feeding:BX_condition            | 2     | 55    | 0.496   | 0.6116    |
| day_feeding:wheat_line              | 2     | 55    | 1.546   | 0.2223    |
| BX_condition:wheat_line             | 1     | 31    | 2.919   | 0.09756   |
| day_feeding:BX_condition:wheat_line | 2     | 55    | 1.424   | 0.2494    |

Table 3: Linear mixed-effect model on Caterpillar growth rate, only Fiorina. Model = caterpillar growth rate ~ day\_feeding \* BX\_condition, random=~1|individual

|                          | numDF | denDF | F-value | p-value   |
|--------------------------|-------|-------|---------|-----------|
| (Intercept)              | 1     | 26    | 51.37   | 1.303e-07 |
| day_feeding              | 2     | 26    | 17.33   | 1.651e-05 |
| BX_condition             | 1     | 15    | 5.39    | 0.03474   |
| day_feeding:BX_condition | 2     | 26    | 0.8752  | 0.4287    |

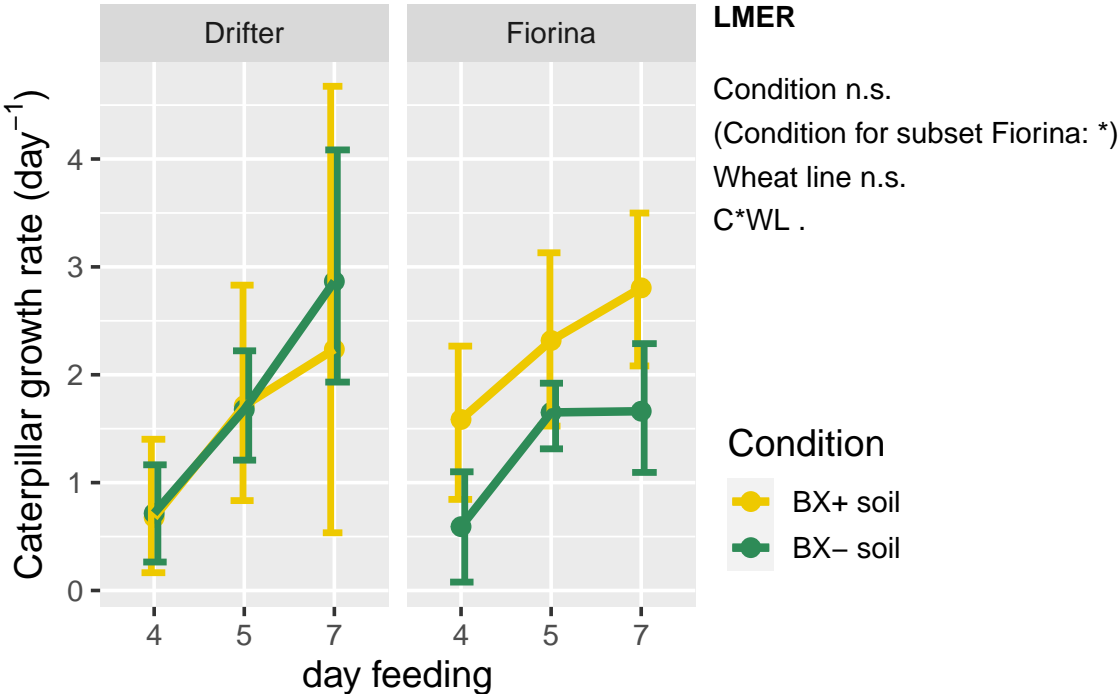

**Figure 5 | BX-feedback on wheat insect resistance and chlorophyll content**

Wheat plants from cultivar Drifter and Fiorina were grown on 'BX+' and 'BX-' variants of Changins soil. Caterpillar performance of *Spodoptera littoralis* fed with leaves of 5 weeks old plants was measured after 4, 5 and 7 days of feeding. The LME (model:  $\sim$  day\_feeding \* condition (C) \* wheat\_line (WL), random factor = individual) results are reported next to the figure (significance code:  $P < 0.001$  \*\*\*;  $P < 0.01$  \*\*,  $P < 0.05$  \*;  $P < 0.1$  †; 'n.s.' = not significant).

# Wheat chlorophyll content

Table 4: ANOVA on chlorophyll content, at 5 weeks. Model = chlorophyll ~ BX\_condition \* wheat\_line

|                                | Sum Sq | Pr(>F)   |
|--------------------------------|--------|----------|
| <b>BX_condition</b>            | 41.76  | 0.09075  |
| <b>wheat_line</b>              | 6.24   | 0.5047   |
| <b>BX_condition:wheat_line</b> | 143.9  | 0.002844 |
| <b>Residuals</b>               | 424.7  | NA       |

Table 5: t.test on chlorophyll content, at 5 weeks

| wheat_line | mean in BX+ | mean in BX- | p.value |
|------------|-------------|-------------|---------|
| Drifter    | 30.47       | 29.53       | 0.3037  |
| Fiorina    | 26.98       | 30.61       | 0.03066 |

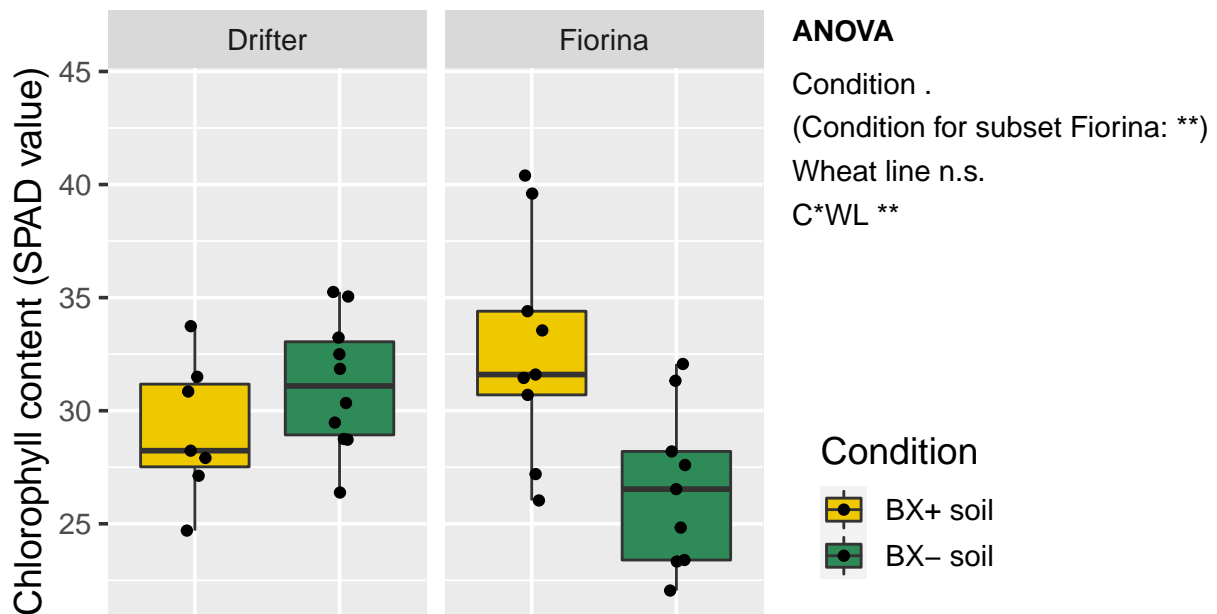

Figure 5 | BX-feedback on wheat insect resistance and chlorophyll content

Wheat plants from cultivar Drifter and Fiorina were grown on ‘BX+’ and ‘BX-’ variants of Changins soil. Leaf chlorophyll content (SPAD values) was measured on 6 weeks old plants. Data S4 documents the statistical analyses in detail. The ANOVA (model: ~ condition (C) \* wheat\_line (WL)) results are reported next to the figure (significance code: P < 0.001 \*\*\*, P < 0.01 \*\*, P < 0.05 \*, P < 0.1 ‘;’, ‘n.s.’ = not significant).

## Descriptive statistics

Table 6: Mean and standard deviation (sd) of measures. Dr = Drifter Fio = Fiorina (continued below)

|                                        | mean BX+ Dr | sd BX+ Dr | mean BX- Dr | sd BX- Dr |
|----------------------------------------|-------------|-----------|-------------|-----------|
| <b><code>insect_growth_rate</code></b> | 1.468       | 1.919     | 1.753       | 1.509     |
| <b><code>chlorophyll</code></b>        | 29.15       | 3.048     | 31.16       | 2.916     |

Table 7: Table continues below

|                                        | percent diff Dr | mean BX+ Fio | sd BX+ Fio |
|----------------------------------------|-----------------|--------------|------------|
| <b><code>insect_growth_rate</code></b> | 17.67           | 2.236        | 1.265      |
| <b><code>chlorophyll</code></b>        | 6.65            | 32.77        | 4.898      |

|                                        | mean BX- Fio | sd BX- Fio | percent diff Fio |
|----------------------------------------|--------------|------------|------------------|
| <b><code>insect_growth_rate</code></b> | 1.231        | 0.8766     | -58.01           |
| <b><code>chlorophyll</code></b>        | 26.59        | 3.545      | -20.81           |
