# Supplementary material for: Soil composition and plant genotype determine benzoxazinoid‐mediated plant–soil feedbacks in cereals
Source: PubMed Central journal article supplement — Plant Cell Environ. 2021 Sep 23;44(12):3732–44. doi: 10.1111/pce.14184 (PMC9292949; doi:10.1111/pce.14184), 2021-09-23
Supplement: PCE-44-3732-s005.pdf [file PCE-44-3732-s005.pdf]

# Experiment 6 - Data S4

*Selma Cadot and Klaus Schlaeppli*

*2021-07-01*

## Experiment 6 – Genetics of BX-feedbacks on maize

The Experiment 6 was performed with maize using regular potting soil (Klasmann–Deilmann GmbH, Germany), which was conditioned in 3L-pots (13.1 cm depth and 20.2 cm diameter) in the greenhouse. The conditioning was not only done with B73 and bx1(B73) but also with the maize lines W22, bx1(W22), bx2(W22) and bx6(W22). The growth conditions and maize lines were described earlier (Hu et al., 2018; ‘Benzoxazinoid pathway experiment’). Different compared to the earlier experiment is that here we utilized potting soil and we only grew B73 plants on B73 and W22 conditioned soils ( $n = 8$ –11 replicates; see Data S6 for experimental design). Pots were randomly placed on a greenhouse table ( $26\text{ °C} \pm 2\text{ °C}$ , 55% relative humidity, 14:10 h light/dark, 50,000  $\text{lm m}^{-2}$ ) and re-arranged weekly. Plants were watered three times per week. Ten weeks after planting, the shoot biomass and larval growth were measured.

Table 1: Number of replicates

| B73 | bx1(B73) | W22 | bx1(W22) | bx2(W22) | bx6(W22) |
|-----|----------|-----|----------|----------|----------|
| 11  | 10       | 10  | 8        | 9        | 10       |

Feedback experiment with maize B73 grown on Changins soil conditioned by maize B73 and W22 (*background* variable), and mutants B73(*bx1*), W22, W22(*bx1*), W22(*bx2*), W22(*bx6*) (*BXgenotype\_condition* variable).

# Maize fresh weight

Table 2: ANOVA and Tukey test. formula = shoot fresh weight ~ BXgenotype\_condition \* background

|                                        | Sum Sq | Pr(>F)    |
|----------------------------------------|--------|-----------|
| <b>BXgenotype_condition</b>            | 239.2  | 0.0004294 |
| <b>background</b>                      | 0.4423 | 0.8433    |
| <b>BXgenotype_condition:background</b> | 10.08  | 0.3474    |
| <b>Residuals</b>                       | 582.8  | NA        |

- **BXgenotype\_condition:**

|                | diff    | lwr    | upr     | p adj     |
|----------------|---------|--------|---------|-----------|
| <b>bx2-bx1</b> | -1.346  | -4.974 | 2.281   | 0.7586    |
| <b>bx6-bx1</b> | -0.6652 | -4.17  | 2.839   | 0.9578    |
| <b>WT-bx1</b>  | -4.633  | -7.487 | -1.779  | 0.0004156 |
| <b>bx6-bx2</b> | 0.6809  | -3.402 | 4.763   | 0.9707    |
| <b>WT-bx2</b>  | -3.287  | -6.827 | 0.2532  | 0.07773   |
| <b>WT-bx6</b>  | -3.968  | -7.382 | -0.5538 | 0.01667   |

- **background:**

|                | diff   | lwr    | upr  | p adj  |
|----------------|--------|--------|------|--------|
| <b>W22-B73</b> | 0.1545 | -1.681 | 1.99 | 0.8665 |

- **BXgenotype\_condition:background:**

|                        | diff    | lwr     | upr     | p adj   |
|------------------------|---------|---------|---------|---------|
| <b>WT:B73-bx1:B73</b>  | -3.7    | -8.319  | 0.9187  | 0.2063  |
| <b>bx1:W22-bx1:B73</b> | 1.321   | -3.693  | 6.335   | 0.9904  |
| <b>bx2:W22-bx1:B73</b> | -0.7589 | -5.616  | 4.098   | 0.9996  |
| <b>bx6:W22-bx1:B73</b> | -0.078  | -4.805  | 4.649   | 1       |
| <b>WT:W22-bx1:B73</b>  | -4.426  | -9.153  | 0.3014  | 0.08191 |
| <b>bx1:W22-WT:B73</b>  | 5.021   | 0.1094  | 9.933   | 0.04176 |
| <b>bx2:W22-WT:B73</b>  | 2.941   | -1.81   | 7.692   | 0.5213  |
| <b>bx6:W22-WT:B73</b>  | 3.622   | -0.9967 | 8.241   | 0.2286  |
| <b>WT:W22-WT:B73</b>   | -0.726  | -5.345  | 3.893   | 0.9996  |
| <b>bx2:W22-bx1:W22</b> | -2.08   | -7.217  | 3.056   | 0.9026  |
| <b>bx6:W22-bx1:W22</b> | -1.399  | -6.413  | 3.615   | 0.9865  |
| <b>WT:W22-bx1:W22</b>  | -5.747  | -10.76  | -0.7331 | 0.01436 |
| <b>bx6:W22-bx2:W22</b> | 0.6809  | -4.176  | 5.538   | 0.9998  |
| <b>WT:W22-bx2:W22</b>  | -3.667  | -8.524  | 1.19    | 0.2707  |
| <b>WT:W22-bx6:W22</b>  | -4.348  | -9.075  | 0.3794  | 0.09255 |

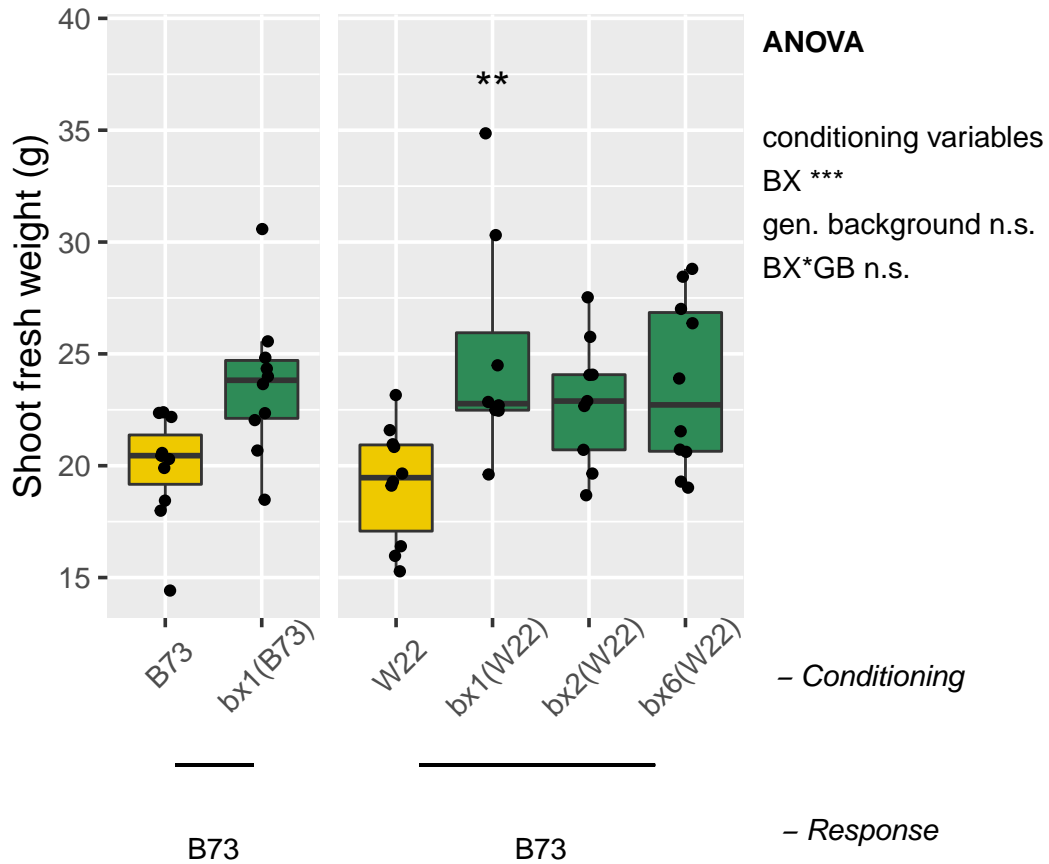

**Figure 4 | Genetics of BX-feedback on maize**

Potting soil was conditioned with B73 and bx1(B73) as well as with W22, bx1(W22), bx2(W22) and bx6(W22) followed by a feedback phase with only B73 plants (n = 8–11). Ten week old plants were utilized for measuring shoot biomass (fresh weight). The ANOVA results (model: ~ BX condition (BX) \* genetic background condition (GB)) are reported next to the Figure and the pair-wise Tukey-test results inside the panels (pair-wise comparison with wild-type, significance code: P < 0.01 \*\*, P < 0.05 \*; not significant = ‘n.s.’).

## Insect growth rate

Table 6: ANOVA and Tukey test. formula = caterpillar growth rate ~ BXgenotype\_condition \* background

|                                        | Sum Sq    | Pr(>F)   |
|----------------------------------------|-----------|----------|
| <b>BXgenotype_condition</b>            | 11.88     | 0.001228 |
| <b>background</b>                      | 0.2247    | 0.5587   |
| <b>BXgenotype_condition:background</b> | 3.557e-05 | 0.9941   |
| <b>Residuals</b>                       | 33.74     | NA       |

- **BXgenotype\_condition:**

|                | diff     | lwr     | upr      | p adj    |
|----------------|----------|---------|----------|----------|
| <b>bx2-bx1</b> | -0.1555  | -1.028  | 0.7173   | 0.9647   |
| <b>bx6-bx1</b> | -0.08692 | -0.9301 | 0.7562   | 0.9928   |
| <b>WT-bx1</b>  | -0.9968  | -1.683  | -0.3101  | 0.001781 |
| <b>bx6-bx2</b> | 0.06857  | -0.9137 | 1.051    | 0.9977   |
| <b>WT-bx2</b>  | -0.8413  | -1.693  | 0.0104   | 0.05402  |
| <b>WT-bx6</b>  | -0.9099  | -1.731  | -0.08852 | 0.02445  |

- **background:**

|                | diff    | lwr     | upr    | p adj  |
|----------------|---------|---------|--------|--------|
| <b>W22-B73</b> | -0.1101 | -0.5517 | 0.3315 | 0.6189 |

- **BXgenotype\_condition:background:**

|                        | diff      | lwr     | upr       | p adj   |
|------------------------|-----------|---------|-----------|---------|
| <b>WT:B73-bx1:B73</b>  | -0.9937   | -2.105  | 0.1175    | 0.1112  |
| <b>bx1:W22-bx1:B73</b> | -0.1544   | -1.361  | 1.052     | 0.9999  |
| <b>bx2:W22-bx1:B73</b> | -0.2241   | -1.393  | 0.9444    | 0.9987  |
| <b>bx6:W22-bx1:B73</b> | -0.1556   | -1.293  | 0.9818    | 0.9999  |
| <b>WT:W22-bx1:B73</b>  | -1.144    | -2.282  | -0.006931 | 0.04761 |
| <b>bx1:W22-WT:B73</b>  | 0.8393    | -0.3424 | 2.021     | 0.3445  |
| <b>bx2:W22-WT:B73</b>  | 0.7696    | -0.3735 | 1.913     | 0.4127  |
| <b>bx6:W22-WT:B73</b>  | 0.8382    | -0.273  | 1.949     | 0.2719  |
| <b>WT:W22-WT:B73</b>   | -0.1506   | -1.262  | 0.9607    | 0.9999  |
| <b>bx2:W22-bx1:W22</b> | -0.0697   | -1.306  | 1.166     | 1       |
| <b>bx6:W22-bx1:W22</b> | -0.001131 | -1.208  | 1.205     | 1       |
| <b>WT:W22-bx1:W22</b>  | -0.9899   | -2.196  | 0.2165    | 0.1827  |
| <b>bx6:W22-bx2:W22</b> | 0.06857   | -1.1    | 1.237     | 1       |
| <b>WT:W22-bx2:W22</b>  | -0.9202   | -2.089  | 0.2484    | 0.2241  |
| <b>WT:W22-bx6:W22</b>  | -0.9888   | -2.126  | 0.1486    | 0.1323  |

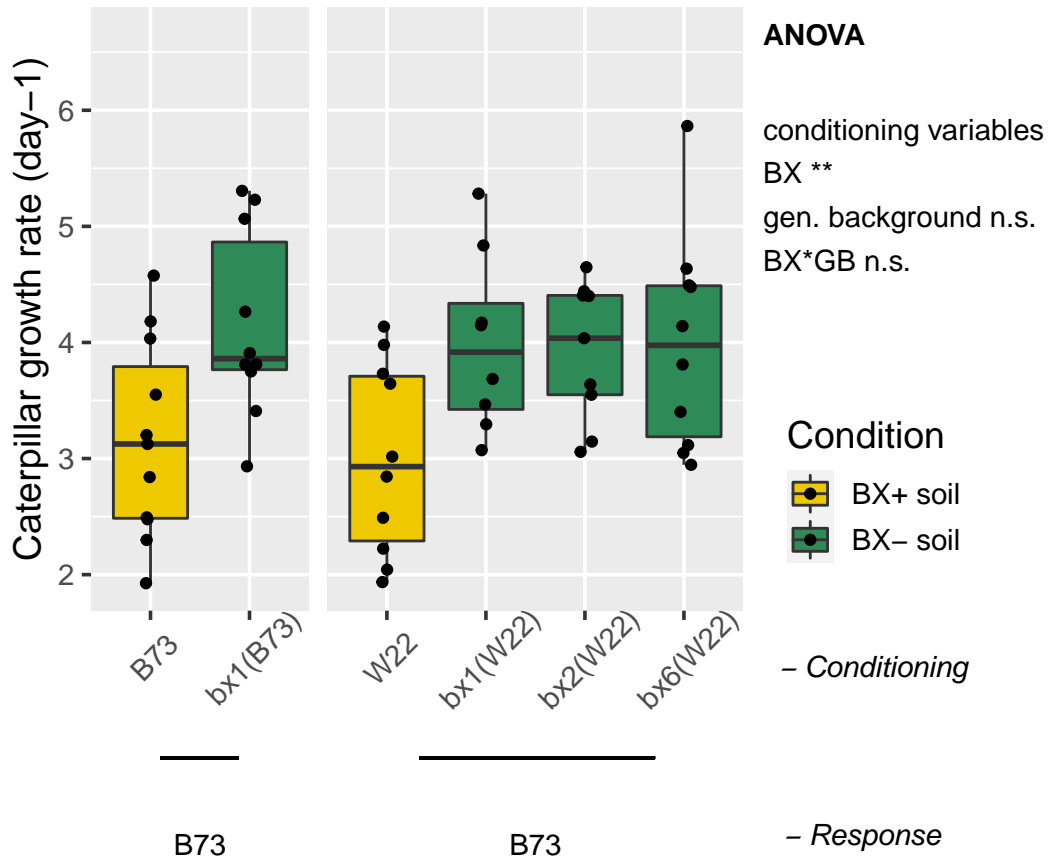

**Figure 4 | Genetics of BX-feedback on maize**

Potting soil was conditioned with B73 and bx1(B73) as well as with W22, bx1(W22), bx2(W22) and bx6(W22) followed by a feedback phase with only B73 plants (n = 8–11). Ten week old plants were utilized for measuring *Spodoptera frugiperda* performance. The ANOVA results (model: ~ BX condition (BX) \* genetic background condition (GB)) are reported next to the Figure and the pair-wise Tukey-test results inside the panels (pair-wise comparison with wild-type, significance code: P < 0.01 \*\*, P < 0.05 \*, not significant = 'n.s.').
