# Supplementary material for: Soil composition and plant genotype determine benzoxazinoid‐mediated plant–soil feedbacks in cereals
Source: PubMed Central journal article supplement — Plant Cell Environ. 2021 Sep 23;44(12):3732–44. doi: 10.1111/pce.14184 (PMC9292949; doi:10.1111/pce.14184), 2021-09-23
Supplement: PCE-44-3732-s006.pdf [file PCE-44-3732-s006.pdf]

# Experiment 3 - Data S3

Cadot et al.

2021-07-01

## Experiment 3 – BX-feedbacks on wheat on growth and physiology

The third feedback experiment was performed with wheat, again, with a randomized design testing the factor conditioning (BX+ or BX-). The experiment was conducted with a greenhouse-conditioned batch of Changins soil and a field-conditioned batch of Reckenholz soil (Table S1). Because of fewer amounts of the Changins soil, this part of the experiment was performed in 0.5 L pots (16 experimental units = 2 BX conditions \* 8 replicates; see Data S3 for experimental design). The other part of the experiment with Reckenholz soil was conducted with 1L pots (20 experimental units = 2 BX conditions \* 10 replicates; Data S3). Because of the differences in pot size and how the soils were conditioned, we do not compare the two soils in this experiment. We grew the two wheat cultivars ‘Drifter’, a hard winter wheat cultivar, and ‘Fiorina’, a spring wheat currently used by Swiss farmers. Six seeds were sowed per pot and two weeks after seeds germinated the number of plants was reduced to 5 for plants growing in the bigger pots, and reduced to 4 for the ones in smaller pots. Growth conditions in the greenhouse included a light period from 8:00 to 22:00, 70% relative humidity and temperatures of 22°C (day) and 18°C (night). Fertilization was done by mixing NPK granules (Osmocote exact, Standard 5-6M; 15-9-12 NPK, 2MgO and micronutrient; 4g / kg soil) into the soils before filling the pots. Plants were uniformly watered with tap water when needed. Chlorophyll content was measured at 3, 4, 5 and 6 weeks after sowing. The experiment was harvested at 6 weeks (plants were before flowering) as follows: the second fully unfolded leaves were cut, immediately wrapped in aluminium paper, shock-frozen in liquid nitrogen and then stored at -80° until hormone analysis. The remaining aboveground shoots were cut and recorded as fresh and dry weight (after drying in an oven at 60°C for 72h ) biomass per pot.

Table 1: Number of replicates

|                           | BX+ | BX- |
|---------------------------|-----|-----|
| <b>Changins_Drifter</b>   | 7   | 8   |
| <b>Changins_Fiorina</b>   | 7   | 7   |
| <b>Reckenholz_Drifter</b> | 10  | 10  |
| <b>Reckenholz_Fiorina</b> | 10  | 9   |

Feedback experiment with wheat (Drifter and Fiorina) (*wheat\_line* variable) grown on Changins and eckenholz field soil (*soil* variable) conditioned with maize B73 (BX+ soil) and B73(*bx1*) (BX- soil) (*BX\_condition* variable).

## Wheat biomass

Table 2: ANOVA on wheat shoot fresh weight (FW) and dry weight (DW). Model = response variable ~ BX\_condition \* soil \* wheat\_line

|                                     | Sum Sq    | Pr(>F)  | Sum Sq    | Pr(>F)  |
|-------------------------------------|-----------|---------|-----------|---------|
| <b>1</b>                            | <b>FW</b> |         | <b>DW</b> |         |
| <b>BX_condition</b>                 | 1.36378   | 0.00771 | 0.00107   | 0.00586 |
| <b>soil</b>                         | 3.69271   | 3e-05   | 0.16062   | 0       |
| <b>wheat_line</b>                   | 2.56254   | 0.00036 | 0.00094   | 0.00964 |
| <b>BX_condition:soil</b>            | 0.00367   | 0.88677 | 1e-04     | 0.37746 |
| <b>BX_condition:wheat_line</b>      | 0.00348   | 0.88963 | 1e-04     | 0.38835 |
| <b>soil:wheat_line</b>              | 0.00498   | 0.86822 | 0         | 0.8964  |
| <b>BX_condition:soil:wheat_line</b> | 0.00167   | 0.92339 | 0         | 0.97473 |
| <b>Residuals</b>                    | 10.76128  | NA      | 0.00785   | NA      |

Table 3: t.test on wheat shoot fresh weight

| soil_wheat_line    | mean in BX+ | mean in BX- | p.value |
|--------------------|-------------|-------------|---------|
| Changins_Drifter   | 2.491       | 2.756       | 0.3156  |
| Changins_Fiorina   | 2.08        | 2.351       | 0.1568  |
| Reckenholz_Drifter | 2.942       | 3.218       | 0.1785  |
| Reckenholz_Fiorina | 2.545       | 2.868       | 0.1006  |

Table 4: t.test on wheat shoot dry weight

| soil_wheat_line    | mean in BX+ | mean in BX- | p.value |
|--------------------|-------------|-------------|---------|
| Changins_Drifter   | 0.3407      | 0.3453      | 0.6044  |
| Changins_Fiorina   | 0.35        | 0.35        | 1       |
| Reckenholz_Drifter | 0.2394      | 0.2492      | 0.03061 |
| Reckenholz_Fiorina | 0.2496      | 0.2544      | 0.2446  |

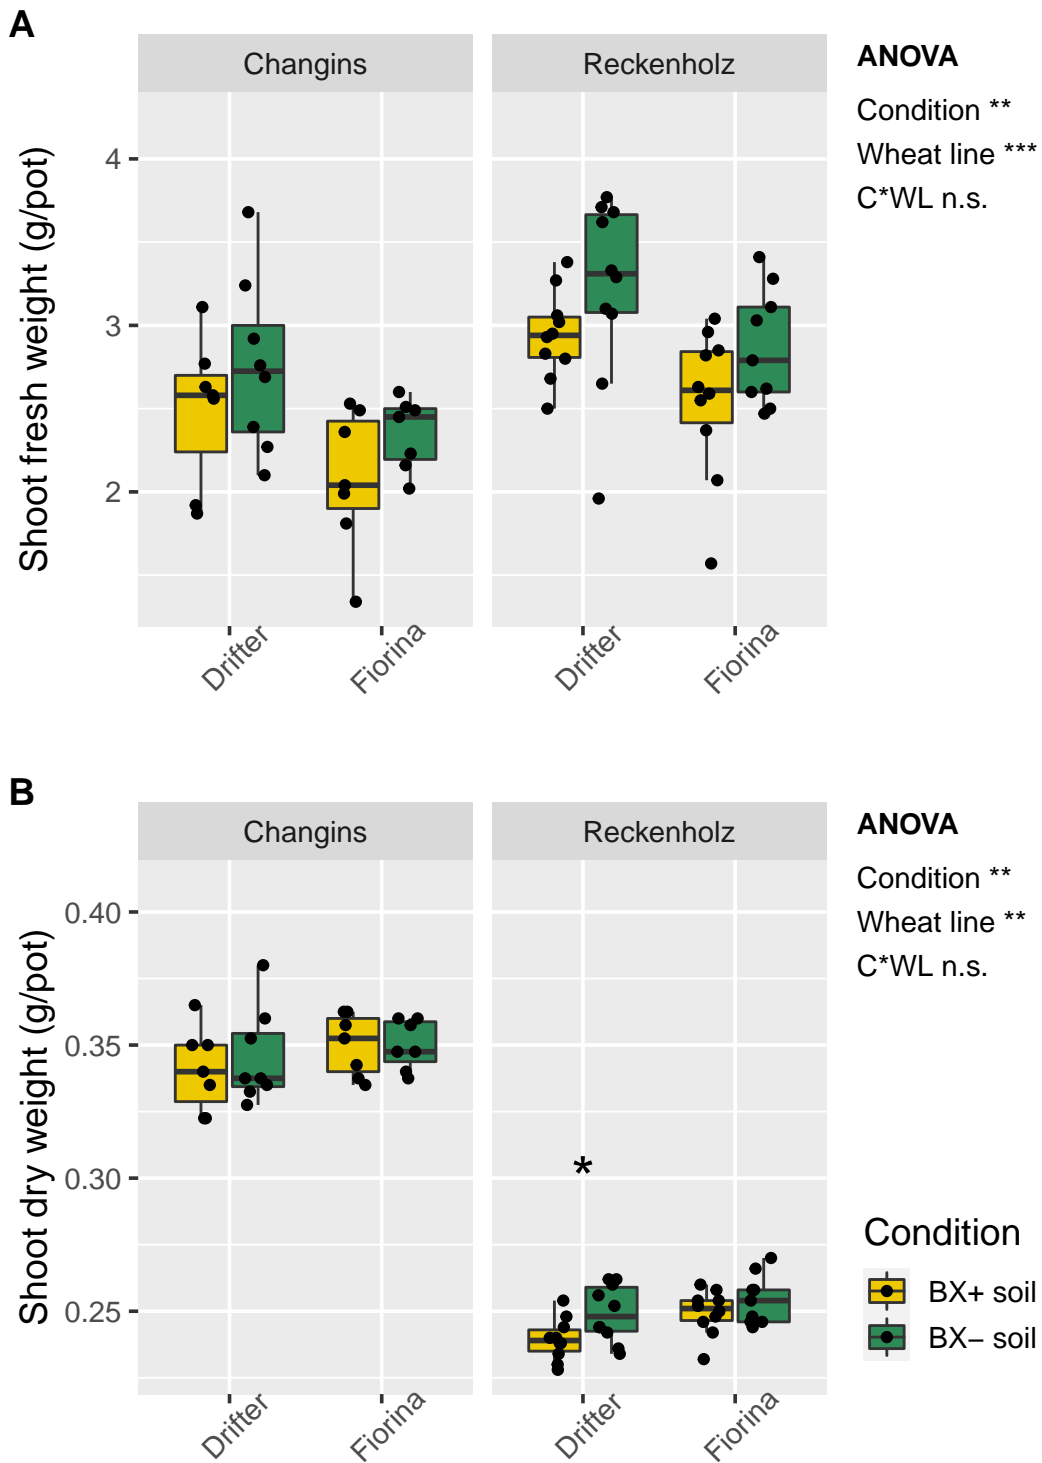

## pdf  
 ## 2

**Figure 3 | BX-feedback on wheat growth**

Wheat plants were grown on ‘BX+’ and ‘BX-’ variants of Changins and Reckenholz soils. Shoot biomass was measured as (A) fresh and (B) dry weight for the two wheat lines Drifter and Fiorina after 6 weeks of growth. The ANOVA results (model: ~ condition (C) \* wheat line (WL)) are reported next to the Figure and the pair-wise T-test results inside the panels (Significance code: P < 0.001 \*\*\*; P < 0.01 \*\*, P < 0.05 \*; not

significant = 'n.s.').

## Wheat chlorophyll content (SPAD values)

Table 5: Linear mixed effect model on chlorophyll content, measured at week 3, 4, 5 and 6. Model: SPAD ~ week \* BX\_condition \* soil \* wheat\_line, random=pot

|                         | numDF | denDF | F-value | p-value   |
|-------------------------|-------|-------|---------|-----------|
| (Intercept)             | 1     | 180   | 68367   | 0         |
| week                    | 3     | 180   | 183.2   | 0         |
| BX_condition            | 1     | 60    | 8.286   | 0.005529  |
| soil                    | 1     | 60    | 138.2   | 0         |
| wheat_line              | 1     | 60    | 41.93   | 1.948e-08 |
| week:BX_condition       | 3     | 180   | 4.054   | 0.0081    |
| week:soil               | 3     | 180   | 15.43   | 5.631e-09 |
| BX_condition:soil       | 1     | 60    | 3.288   | 0.07479   |
| week:wheat_line         | 3     | 180   | 18.48   | 1.702e-10 |
| BX_condition:wheat_line | 1     | 60    | 0.0553  | 0.8149    |
| soil:wheat_line         | 1     | 60    | 2.891   | 0.09424   |

Table 6: ANOVA on chlorophyll content for each week. Model: SPAD ~ BX\_condition \* soil \* wheat\_line (continued below)

|                              | Sum Sq         | Pr(>F)  | Sum Sq         |
|------------------------------|----------------|---------|----------------|
| <b>1</b>                     | <b>3 weeks</b> |         | <b>4 weeks</b> |
| BX_condition                 | 2.48529        | 0.34051 | 107.75529      |
| soil                         | 13.6889        | 0.0278  | 499.36726      |
| wheat_line                   | 91.47675       | 0       | 663.49628      |
| BX_condition:soil            | 0.19668        | 0.78787 | 46.32785       |
| BX_condition:wheat_line      | 9.39158        | 0.06669 | 50.5555        |
| soil:wheat_line              | 0.5857         | 0.6426  | 55.48283       |
| BX_condition:soil:wheat_line | 1.81668        | 0.41464 | 0.11526        |
| Residuals                    | 161.53399      | NA      | 557.54457      |

Table 7: Table continues below

|                              | Pr(>F)  | Sum Sq         | Pr(>F)  |
|------------------------------|---------|----------------|---------|
| <b>1</b>                     |         | <b>5 weeks</b> |         |
| BX_condition                 | 0.00118 | 10.64132       | 0.15817 |
| soil                         | 0       | 447.11101      | 0       |
| wheat_line                   | 0       | 41.69144       | 0.00635 |
| BX_condition:soil            | 0.0293  | 7.16076        | 0.24571 |
| BX_condition:wheat_line      | 0.02305 | 1.31057        | 0.61784 |
| soil:wheat_line              | 0.0175  | 4.95697        | 0.33329 |
| BX_condition:soil:wheat_line | 0.91169 | 0.98663        | 0.66502 |
| Residuals                    | NA      | 312.63114      | NA      |

|          | Sum Sq         | Pr(>F) |
|----------|----------------|--------|
| <b>1</b> | <b>6 weeks</b> |        |

|                                     | Sum Sq    | Pr(>F)  |
|-------------------------------------|-----------|---------|
| <b>BX_condition</b>                 | 13.81504  | 0.19889 |
| <b>soil</b>                         | 194.29624 | 1e-05   |
| <b>wheat_line</b>                   | 8.71827   | 0.30623 |
| <b>BX_condition:soil</b>            | 0.06962   | 0.92683 |
| <b>BX_condition:wheat_line</b>      | 1.77515   | 0.64314 |
| <b>soil:wheat_line</b>              | 23.67912  | 0.09417 |
| <b>BX_condition:soil:wheat_line</b> | 10.24939  | 0.26763 |
| <b>Residuals</b>                    | 491.18347 | NA      |

Table 9: t.test on chlorophyll at week 4

| soil_wheat_line    | mean in BX+ | mean in BX- | p.value |
|--------------------|-------------|-------------|---------|
| Changins_Drifter   | 39.95       | 37.04       | 0.06404 |
| Changins_Fiorina   | 34.1        | 27.79       | 0.01543 |
| Reckenholz_Drifter | 42.77       | 43.3        | 0.6133  |
| Reckenholz_Fiorina | 40.41       | 37.87       | 0.08241 |

Table 10: t.test on chlorophyll at week 5

| soil_wheat_line    | mean in BX+ | mean in BX- | p.value |
|--------------------|-------------|-------------|---------|
| Changins_Drifter   | 45.13       | 43.19       | 0.06911 |
| Changins_Fiorina   | 43.64       | 42.78       | 0.4436  |
| Reckenholz_Drifter | 49.96       | 49.77       | 0.8489  |
| Reckenholz_Fiorina | 47.87       | 47.78       | 0.9495  |

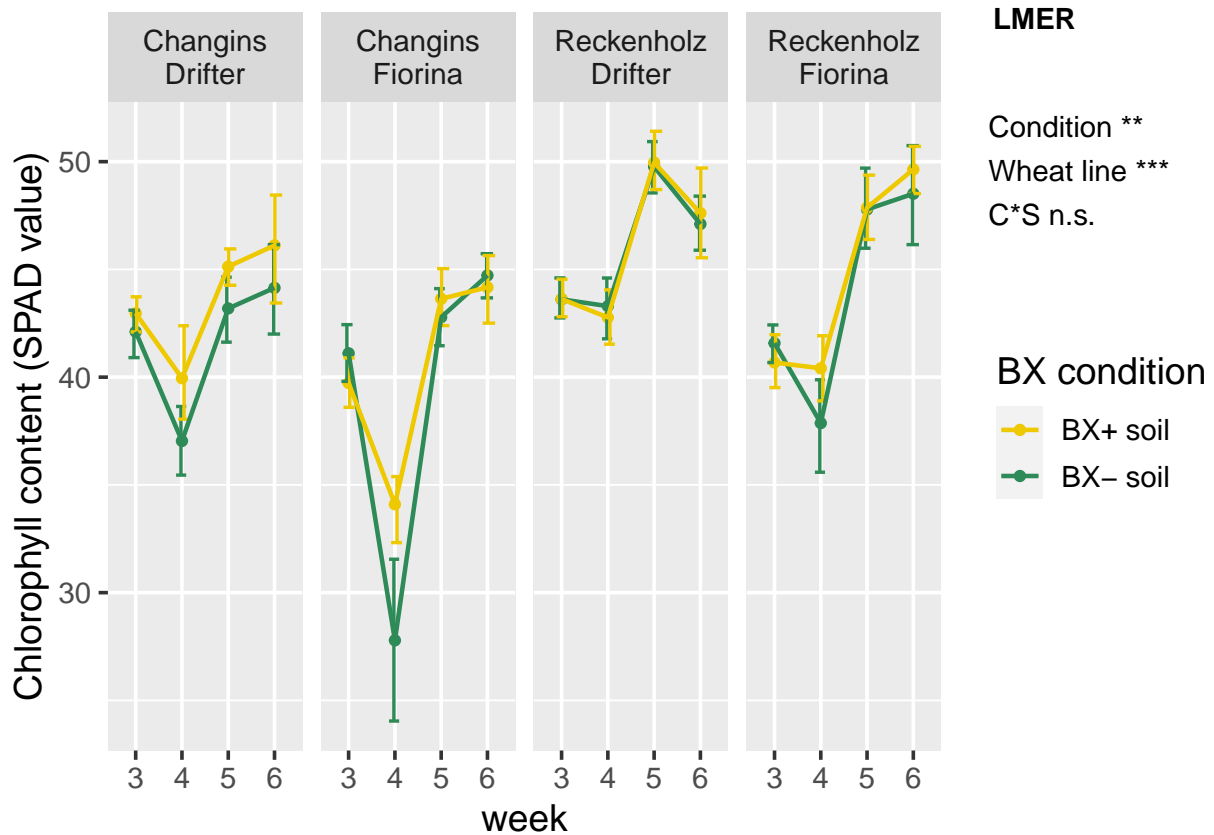

**Figure S2 | BX-effect on wheat leaf chlorophyll content during growth**

Wheat plants from cultivar Drifter and Fiorina were grown on ‘BX+’ and ‘BX-’ variants of Changins and Reckenholz soil. Mean chlorophyll content (SPAD values) per pot was measured from the 3rd to the 6th week of plant growth. The LME results for condition and wheat line variables (model: ~ week \* soil and pot size \* condition (C) \* wheat line (WL), random factor = pot) are reported next to the figure (significance code: P < 0.001 \*\*\*; P < 0.01 \*\*, P < 0.05 \*; ‘n.s.’ = not significant).

## Wheat hormones

Table 11: ANOVA on plant hormone concentration of jasmonic acid (JA), salicylic acid (SA), abscisic acid (ABA), Jasmonic acid -Isoleucine (JA-Ile), Oxo-phytodienoic acid (OPDA) at 6 weeks. Model = response variable ~ BX\_condition \* soil \* wheat\_line (continued below)

|                              | Sum Sq    | Pr(>F)  | Sum Sq      | Pr(>F)  |
|------------------------------|-----------|---------|-------------|---------|
| <b>1</b>                     | <b>JA</b> |         | <b>SA</b>   |         |
| BX_condition                 | 0.00921   | 0.57225 | 10.68026    | 0.9099  |
| soil                         | 0.01194   | 0.52056 | 630.14286   | 0.38799 |
| wheat_line                   | 0.10299   | 0.06712 | 9261.80816  | 0.00231 |
| BX_condition:soil            | 0.00075   | 0.87131 | 255.88446   | 0.58068 |
| BX_condition:wheat_line      | 0.00014   | 0.94398 | 9.58033     | 0.91465 |
| soil:wheat_line              | 0.01483   | 0.47437 | 844.03539   | 0.31888 |
| BX_condition:soil:wheat_line | 0.00261   | 0.76332 | 194.73448   | 0.62965 |
| Residuals                    | 0.70275   | NA      | 22098.89587 | NA      |

Table 12: Table continues below

|                              | Sum Sq     | Pr(>F)  | Sum Sq        | Pr(>F)  |
|------------------------------|------------|---------|---------------|---------|
| <b>1</b>                     | <b>ABA</b> |         | <b>JA-Ile</b> |         |
| BX_condition                 | 389.38682  | 0.17559 | 0.00196       | 0.751   |
| soil                         | 585.02674  | 0.09968 | 0.00492       | 0.61569 |
| wheat_line                   | 1568.02115 | 0.00952 | 0.00161       | 0.77389 |
| BX_condition:soil            | 88.62059   | 0.51259 | 0.00773       | 0.52966 |
| BX_condition:wheat_line      | 53.80542   | 0.60933 | 0.00015       | 0.92994 |
| soil:wheat_line              | 927.01652  | 0.041   | 0.01832       | 0.33585 |
| BX_condition:soil:wheat_line | 62.11938   | 0.58308 | 0.00037       | 0.89067 |
| Residuals                    | 5433.89471 | NA      | 0.51503       | NA      |

|                              | Sum Sq      | Pr(>F)  |
|------------------------------|-------------|---------|
| <b>1</b>                     | <b>OPDA</b> |         |
| BX_condition                 | 15.83568    | 0.2481  |
| soil                         | 3.98107     | 0.55885 |
| wheat_line                   | 148.15451   | 0.00123 |
| BX_condition:soil            | 0.15742     | 0.90718 |
| BX_condition:wheat_line      | 3.93018     | 0.56135 |
| soil:wheat_line              | 29.49155    | 0.11881 |
| BX_condition:soil:wheat_line | 0.60266     | 0.8196  |
| Residuals                    | 306.81563   | NA      |



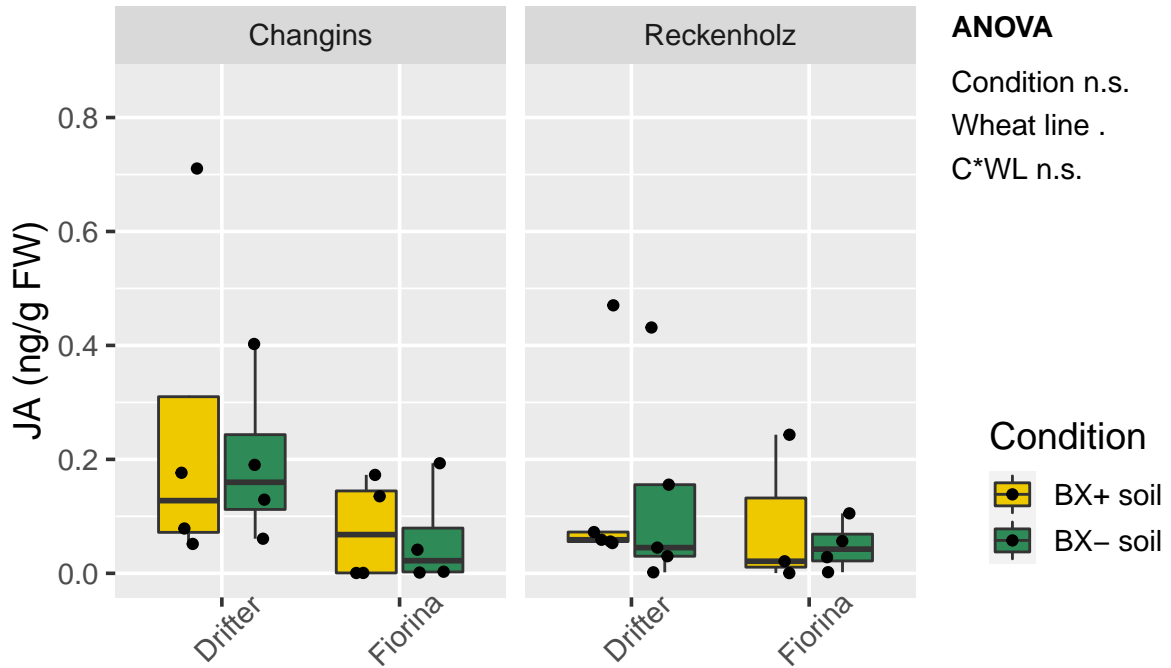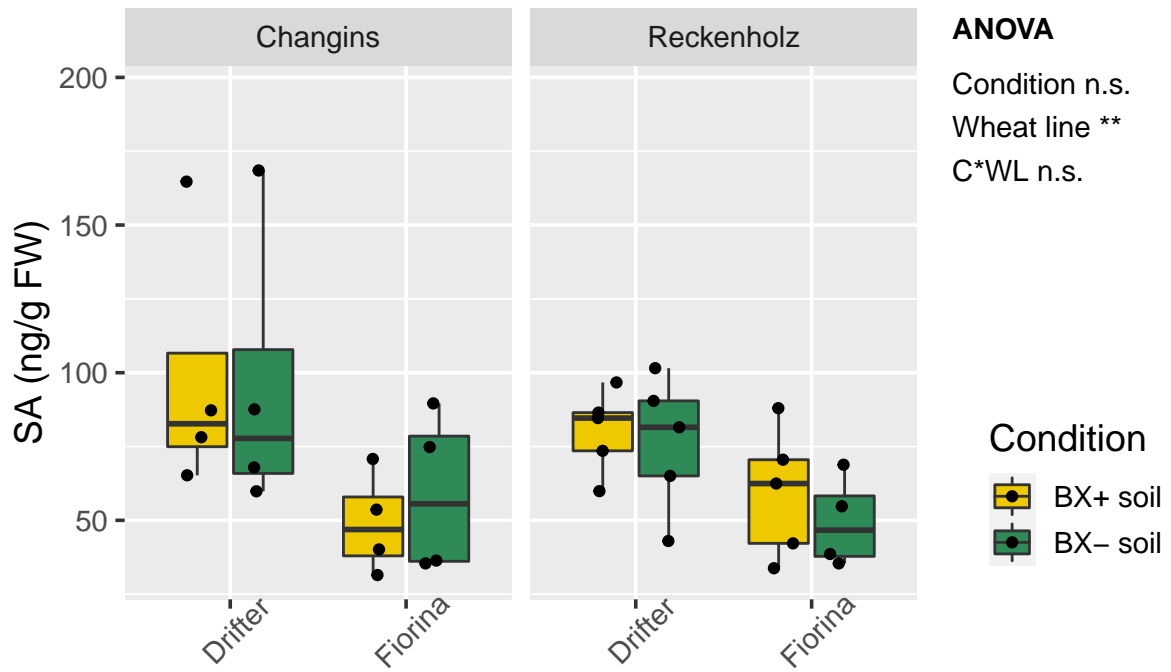

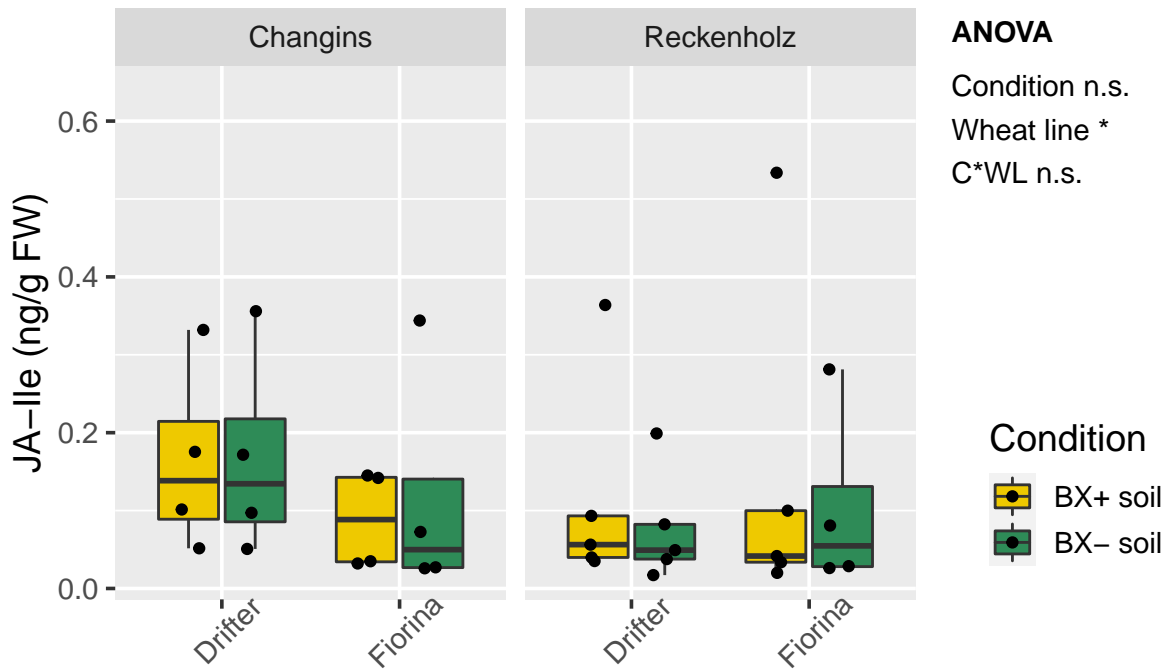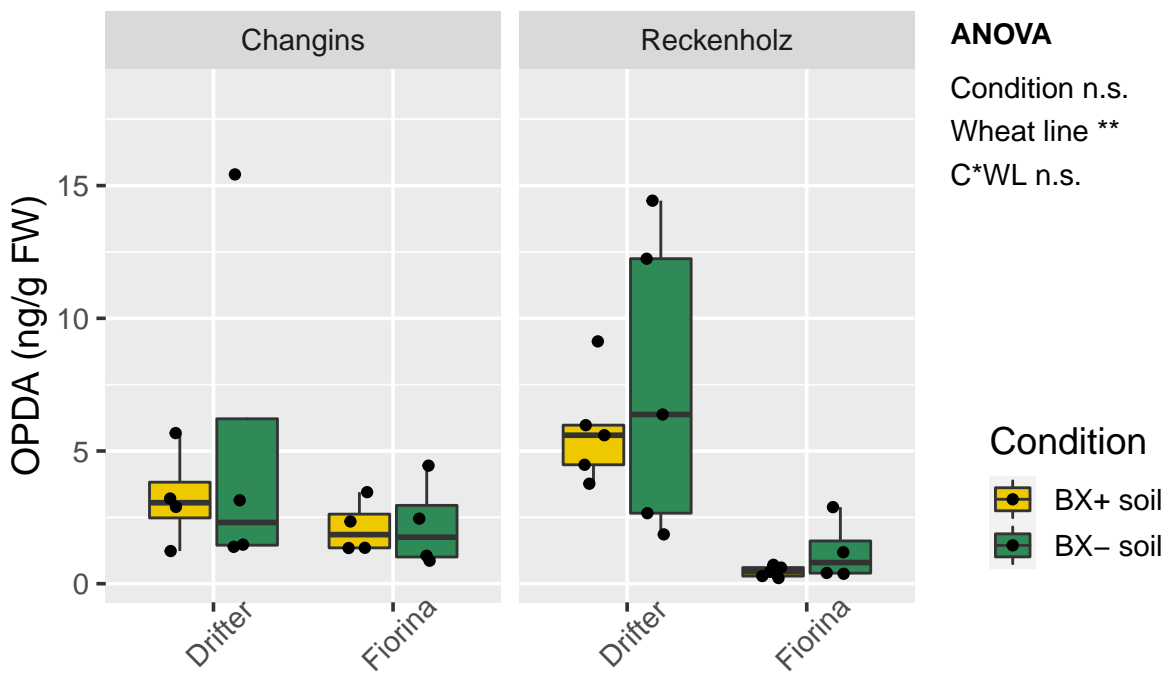

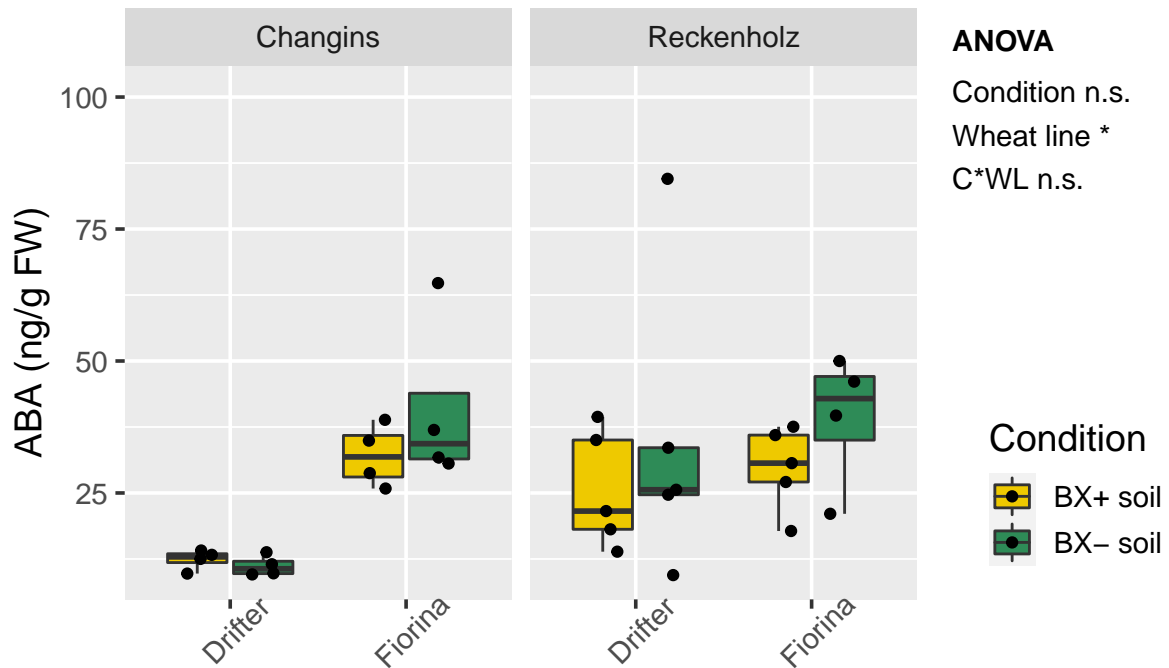

**Figure S3 | BX-effect on wheat hormone concentration**

Wheat plants from cultivar Drifter and Fiorina were grown on ‘BX+’ and ‘BX-’ variants of Changins and Reckenholz soil. Leaf concentration of (A) jasmonic acid (JA), (B) salicylic acid (SA), (C) jasmonic acid – isoleucine (JA-Ile), (D) oxophytodienoic acid and (E) abscisic acid (ABA) were measured in 6 week old plants. The ANOVA results for condition and wheat line (model: ~ soil and pot size \* condition (C) \* wheat line (WL)) are reported next to the figure (significance code:  $P < 0.001$  \*\*\*;  $P < 0.01$  \*\*,  $P < 0.05$  \*;  $P < 0.1$  ?; ‘n.s.’ = not significant).

## Descriptive statistics

Table 14: Mean and standard deviation (sd) of measures. Dr = Drifter, Fio = Fiorina, Ch = Changins, Re = Reckenholz (continued below)

|                    | mean BX+ Dr Ch | sd BX+ Dr Ch | mean BX- Dr Ch |
|--------------------|----------------|--------------|----------------|
| wheat shoot DW (g) | 0.3407         | 0.01559      | 0.3453         |
| wheat shoot FW (g) | 2.491          | 0.4481       | 2.756          |
| spad week4         | 39.95          | 3.149        | 37.04          |

Table 15: Table continues below

|                    | sd BX- Dr Ch | percent diff Dr Ch | mean BX+ Fio Ch |
|--------------------|--------------|--------------------|-----------------|
| wheat shoot DW (g) | 0.01765      | 1.34               | 0.35            |
| wheat shoot FW (g) | 0.5237       | 10.09              | 2.08            |
| spad week4         | 2.42         | -7.57              | 34.1            |

Table 16: Table continues below

|                    | sd BX+ Fio Ch | mean BX- Fio Ch | sd BX- Fio Ch |
|--------------------|---------------|-----------------|---------------|
| wheat shoot DW (g) | 0.01164       | 0.35            | 0.009354      |
| wheat shoot FW (g) | 0.4241        | 2.351           | 0.2149        |
| spad week4         | 2.316         | 27.79           | 5.45          |

Table 17: Table continues below

|                    | percent diff Fio Ch | mean BX+ Dr Re | sd BX+ Dr Re |
|--------------------|---------------------|----------------|--------------|
| wheat shoot DW (g) | 0                   | 0.2394         | 0.007891     |
| wheat shoot FW (g) | 12.25               | 2.942          | 0.2617       |
| spad week4         | -20.41              | 42.77          | 2.185        |

Table 18: Table continues below

|                    | mean BX- Dr Re | sd BX- Dr Re | percent diff Dr Re |
|--------------------|----------------|--------------|--------------------|
| wheat shoot DW (g) | 0.2492         | 0.01059      | 4.01               |
| wheat shoot FW (g) | 3.218          | 0.5657       | 8.96               |
| spad week4         | 43.3           | 2.375        | 1.22               |

Table 19: Table continues below

|                    | mean BX+ Fio Re | sd BX+ Fio Re | mean BX- Fio Re |
|--------------------|-----------------|---------------|-----------------|
| wheat shoot DW (g) | 0.2496          | 0.008208      | 0.2544          |
| wheat shoot FW (g) | 2.545           | 0.4475        | 2.868           |

|                   | mean BX+ Fio Re | sd BX+ Fio Re | mean BX- Fio Re |
|-------------------|-----------------|---------------|-----------------|
| <b>spad week4</b> | 40.41           | 2.506         | 37.87           |

|                           | sd BX- Fio Re | percent diff Fio Re |
|---------------------------|---------------|---------------------|
| <b>wheat shoot DW (g)</b> | 0.009315      | 1.92                |
| <b>wheat shoot FW (g)</b> | 0.3503        | 11.93               |
| <b>spad week4</b>         | 3.471         | -6.5                |
